# Supplementary material for: Significance of Umbilical Cord Leptin Profile during Pregnancy in Gestational Diabetes Mellitus—A Systematic Review and Meta-Analysis
Source: MDPI journal article supplement (doi:10.3390/jcm12144756), 2023-07-18
Supplement: s1 [file s1]

## **Supplementary Information to the manuscript**

# **Significance of Umbilical Cord Leptin Profile during Pregnancy in Gestational Diabetes Mellitus—A Systematic Review and Meta-Analysis**

**María del Mar Roca-Rodríguez <sup>1,\*†</sup>, Pablo Ramos-García <sup>2,\*†</sup>, Cristina López-Tinoco <sup>1,3</sup> and Manuel Aguilar-Diosdado <sup>1,3</sup>**

<sup>1</sup> Department of Endocrinology and Nutrition and Biomedical Research and Innovation Institute of Cadiz (INiBICA), Puerta del Mar University Hospital, 11009 Cadiz, Spain; cristinalopeztinoco@gmail.com (C.L.-T.); manuel.aguilar.sspa@juntadeandalucia.es (M.A.-D.)

<sup>2</sup> Department of Oral Medicine, School of Dentistry, University of Granada, 18071 Granada, Spain

<sup>3</sup> Department of Medicine, Cadiz University (UCA), 11003 Cadiz, Spain

\* Correspondence: maroca80@gmail.com (M.d.M.R.-R.); pabloramos@ugr.es (P.R.-G.)

† These authors contributed equally to this work.

## 1. Search strategy

**Table S1.** Search strategy for each database, number of results, and execution date.

| Database       | Query                                                                                                                                                                                                                                    | Results | Upper date limit |
|----------------|------------------------------------------------------------------------------------------------------------------------------------------------------------------------------------------------------------------------------------------|---------|------------------|
| PubMed         | (“Diabetes, Gestational”[MeSH Terms] OR “Gestational diabetes”[All Fields] OR “Pregnancy in Diabetics”[MeSH Terms] OR “pregnancy diabetes mellitus”[All Fields] OR “GDM”[All Fields]) AND (“leptin”[MeSH Terms] OR “leptin”[All Fields]) | 457     | March, 2022      |
| Embase         | ('pregnancy diabetes mellitus'/exp OR 'pregnancy diabetes mellitus' OR 'Gestational diabetes' OR 'GDM') AND ('leptin'/exp OR 'leptin')                                                                                                   | 933     | March, 2022      |
| Web of Science | TS=("Gestational diabetes" OR "pregnancy diabetes mellitus" OR "GDM") AND TS=("leptin")                                                                                                                                                  | 595     | March, 2022      |
| Scopus         | TITLE-ABS-KEY(("Gestational diabetes" OR "pregnancy diabetes mellitus" OR "GDM") AND "leptin")                                                                                                                                           | 701     | March, 2022      |
| Total          | 2686                                                                                                                                                                                                                                     |         |                  |

## 2. Full-text articles excluded (n = 18)

Marchini G, Fried G, Ostlund E, Hagenäs L. Plasma leptin in infants: relations to birth weight and weight loss. *Pediatrics*. 1998 Mar;101(3 Pt 1):429-32. doi: 10.1542/peds.101.3.429. PMID: 9481009.

No GDM

Gross GA, Solenberger T, Philpott T, Holcomb WL Jr, Landt M. Plasma leptin concentrations in newborns of diabetic and nondiabetic mothers. *Am J Perinatol*. 1998 Apr;15(4):243-7. doi: 10.1055/s-2007-993935. PMID: 9565222.

Lack of essential data

Lepercq J, Cauzac M, Lahlou N, Timsit J, Girard J, Auwerx J, Hauguel-de Mouzon S. Overexpression of placental leptin in diabetic pregnancy: a critical role for insulin. *Diabetes*. 1998 May;47(5):847-50. doi: 10.2337/diabetes.47.5.847. PMID: 9588462.

Lack of essential data

Lewandowski K, Horn R, O'Callaghan CJ, Dunlop D, Medley GF, O'Hare P, Brabant G. Free leptin, bound leptin, and soluble leptin receptor in normal and diabetic pregnancies. *J Clin Endocrinol Metab*. 1999 Jan;84(1):300-6. doi: 10.1210/jcem.84.1.5401. PMID: 9920099.

No GDM

Silva NY, Tennekoon KH, Senanayake L, Karunanayake EH. Cord blood leptin levels in normal pregnancies, pregnancy induced hypertension and gestational diabetes mellitus. *Ceylon Med J*. 2008 Sep;53(3):79-82. doi: 10.4038/cmj.v53i3.246. PMID: 18982799.

Lack of essential data

Jahan S, Zinnat R, Hassan Z, Biswas KB, Habib SH. Gender differences in serum leptin concentrations from umbilical cord blood of newborn infants born to nondiabetic, gestational diabetic and type-2 diabetic mothers. *Int J Diabetes Dev Ctries*. 2009 Oct;29(4):155-8. doi: 10.4103/0973-3930.57346. PMID: 20336197; PMCID: PMC2839129.

#### Overlapping population

Parker M, Rifas-Shiman SL, Belfort MB, Taveras EM, Oken E, Mantzoros C, Gillman MW. Gestational glucose tolerance and cord blood leptin levels predict slower weight gain in early infancy. *J Pediatr*. 2011 Feb;158(2):227-33. doi: 10.1016/j.jpeds.2010.07.052. Epub 2010 Sep 19. PMID: 20855080; PMCID: PMC4270123.

#### Lack of essential data

Ortega-Senovilla H, Schaefer-Graf U, Meitzner K, Abou-Dakn M, Graf K, Kintscher U, Herrera E. Gestational diabetes mellitus causes changes in the concentrations of adipocyte fatty acid-binding protein and other adipocytokines in cord blood. *Diabetes Care*. 2011 Sep;34(9):2061-6. doi: 10.2337/dc11-0715. Epub 2011 Jul 20. PMID: 21775757; PMCID: PMC3161255.

#### Overlapping population

Vela-Huerta MM, Amador-Licona N, Anaya-Aguirre S, Guizar-Mendoza JM, Velazquez-Bustamante A, Murillo-Ortiz B. Insulin and Leptin Levels in Appropriate-for-Gestational-Age Infants of Diabetic Mother. *Iran J Pediatr*. 2012 Dec;22(4):475-80. PMID: 23429837; PMCID: PMC3533147.

#### Lack of essential data

Kara M, Orbak Z, Döneray H, Ozkan B, Akcay F. The Relationship Between Skinfold Thickness and Leptin, Ghrelin, Adiponectin, and Resistin Levels in Infants of Diabetic Mothers. *Fetal Pediatr Pathol*. 2017 Feb;36(1):1-7. doi: 10.1080/15513815.2016.1217960. Epub 2016 Aug 25. PMID: 27559858.

#### Lack of essential data

Al-Daghri NM, Al-Hazmi HA, Al-Ajlan A, Masoud MS, Al-Amro A, Al-Ghamdi A, Alnaami AM, Al-Attas OS, Alokail MS. Associations of Spexin and cardiometabolic parameters among women with and without gestational diabetes mellitus. *Saudi J Biol Sci*. 2018 May;25(4):710-714. doi: 10.1016/j.sjbs.2018.01.002. Epub 2018 Jan 20. PMID: 29740234; PMCID: PMC5936879.

#### Off topic

Shapiro GD, Arbuckle TE, Ashley-Martin J, Fraser WD, Fisher M, Bouchard MF, Monnier P, Morisset AS, Ettinger AS, Dodds L. Associations between maternal triclosan concentrations in early pregnancy and gestational diabetes mellitus, impaired glucose tolerance, gestational weight gain and fetal markers of metabolic function. *Environ Res.* 2018 Feb;161:554-561. doi: 10.1016/j.envres.2017.12.001. PMID: 29241065.

Lack of essential data

Ott R, Stupin JH, Loui A, Eilers E, Melchior K, Rancourt RC, Schellong K, Ziska T, Dudenhausen JW, Henrich W, Plagemann A. Maternal overweight is not an independent risk factor for increased birth weight, leptin and insulin in newborns of gestational diabetic women: observations from the prospective 'EaCH' cohort study. *BMC Pregnancy Childbirth.* 2018 Jun 20;18(1):250. doi: 10.1186/s12884-018-1889-8. PMID: 29925339; PMCID: PMC6011392.

No control group

Kang SJ, Bae JG, Kim S, Park JH. Birth anthropometry and cord blood leptin in Korean appropriate-for-gestational-age infants born at  $\geq 28$  weeks' gestation: a cross sectional study. *Int J Pediatr Endocrinol.* 2020;2020:12. doi: 10.1186/s13633-020-00082-6. Epub 2020 Jun 26. PMID: 32607107; PMCID: PMC7318406.

Lack of essential data

Johnson AW, Snegovskikh D, Parikh L, DeAguiar RB, Han CS, Hwang JJ. Characterizing the Effects of Diabetes and Obesity on Insulin and Leptin Levels amongst Pregnant Women. *Am J Perinatol.* 2020 Sep;37(11):1094-1101. doi: 10.1055/s-0040-1702988. Epub 2020 Mar 2. PMID: 32120424.

Lack of essential data

Mitanchez D, Jacqueminet S, Lebbah S, Dommergues M, Hajage D, Ciangura C. Relative Contribution of Gestational Weight Gain, Gestational Diabetes, and Maternal Obesity to Neonatal Fat Mass. *Nutrients.* 2020 Nov 9;12(11):3434. doi: 10.3390/nu12113434. PMID: 33182482; PMCID: PMC7698189.

Lack of essential data

Tan K, Tint MT, Michael N, Yap F, Chong YS, Tan KH, Godfrey KM, Larbi A, Lee YS, Chan SY, Fortier MV, Eriksson JG, Karnani N. Determinants of cord blood adipokines and association with neonatal abdominal adipose tissue distribution. *Int J Obes (Lond).* 2022

Mar;46(3):637-645. doi: 10.1038/s41366-021-00975-3. Epub 2021 Dec 4. PMID: 34864815; PMCID: PMC8873009.

Lack of essential data

Fyfe R, Burton A, McLennan A, McCudden L, Gordon A, Hyett J. Factors affecting cord blood leptin levels in a consecutive birth cohort. *J Matern Fetal Neonatal Med.* 2022 Mar;35(5):884-889. doi: 10.1080/14767058.2020.1733518. Epub 2020 Jun 29. PMID: 32594793.

Lack of essential data

3. Table S2. Characteristics of analyzed studies (n=16).

| Study                   | Year | Country | Continent     | No. of patients with GDM | M(+/-DE) Cord Leptin GDM | No. of Patients controls | M(+/-DE) Cord Leptin controls | Technique | Units                   | Source of data | Sample source | Study Design | prospective/re trospective | M (+/-DE) Maternal Age GDM | M (+/-DE) Maternal Age controls | M (+/-DE) pregestational BMI GDM | M (+/-DE) pregestational BMI controls | Insulin therapy | M (+/-DE) gestational age at delivery GDM | M (+/-DE) gestational age at delivery controls | M (+/-DE) Caesarean GDM | M (+/-DE) Caesarean controls | M (+/-DE) newborn weight GDM | M (+/-DE) newborn weight controls |
|-------------------------|------|---------|---------------|--------------------------|--------------------------|--------------------------|-------------------------------|-----------|-------------------------|----------------|---------------|--------------|----------------------------|----------------------------|---------------------------------|----------------------------------|---------------------------------------|-----------------|-------------------------------------------|------------------------------------------------|-------------------------|------------------------------|------------------------------|-----------------------------------|
| Maffei et al.           | 1998 | Italy   | Europe        | 17                       | 16,6 ± 12,9              | 60                       | 13,1 ± 8,3                    | ELISA     | ng/ml                   | mean-sd        | plasma        | case-control | prospective                | 31,7 ± 3,2                 | 29 ± 4,5                        | 25,4 ± 4,1                       | 23,3 ± 3,4                            | Yes             | 38,8 ± 2,4                                | 39 ± 2,6                                       | N/A                     | N/A                          | 3442 ± 528                   | 3433 ± 618                        |
| Persson et al.          | 1999 | Sweden  | Europe        | 6                        | 32,3 ± 33,6              | 96                       | 12,9 ± 21,1                   | RIA       | ng/ml                   | mean-sd        | plasma        | case-control | prospective                | N/A                        | N/A                             | N/A                              | N/A                                   | Yes             | 37,3 ± 1,1                                | 39,9 ± 1,1                                     | N/A                     | N/A                          | 3674 ± 637                   | 3821 ± 428                        |
| Tapainanen et al.       | 2001 | Finland | Europe        | 70                       | 31,5 ± 54,7              | 105                      | 19,2 ± 34,4                   | RIA       | mcg/L=ng/ml             | median-iqr     | serum         | case-control | prospective                | N/A                        | N/A                             | N/A                              | N/A                                   | N/A             | 39,4 ± 1,3                                | 39,9 ± 1,5                                     | N/A                     | N/A                          | 3789 ± 598                   | 3701 ± 513                        |
| Hytinanti et al.        | 2001 | Finland | Europe        | 13                       | 21,2 ± 33,7              | 13                       | 12,6 ± 20,3                   | RIA       | mcg/L=ng/ml             | median-iqr     | plasma        | case-control | prospective                | N/A                        | N/A                             | N/A                              | N/A                                   | No              | 40,2 ± 1,4                                | 40,3 ± 1,4                                     | N/A                     | N/A                          | 3757 ± 614                   | 3630 ± 491                        |
| Vitoratos et al.        | 2002 | Greece  | Europe        | 17                       | 4,6 ± 1,6                | 17                       | 2,7 ± 1                       | ELISA     | ng/ml                   | mean-sd        | serum         | case-control | prospective                | 33 ± 2,8                   | 32 ± 3,2                        | 27,2 ± 6,7                       | 25,8 ± 5,9                            | No              | 38 ± 6                                    | 39 ± 2                                         | 0%                      | 0%                           | 3330 ± 162,5                 | 3305,7 ± 165,1                    |
| Okereke et al.          | 2002 | USA     | North America | 34                       | 18,1 ± 16,2              | 44                       | 10,9 ± 9,5                    | RIA       | ng/dl                   | mean-sd        | serum         | case-control | prospective                | N/A                        | N/A                             | N/A                              | N/A                                   | Yes (32,4% GDM) | 38,6 ± 1,3                                | 39,1 ± 1,1                                     | N/A                     | N/A                          | 3480 ± 540                   | 3400 ± 410                        |
| Aman et al.             | 2011 | Sweden  | Europe        | 10                       | 17,6 ± 22,6              | 28                       | 9,4 ± 14,5                    | RIA       | mcg/L=ng/ml             | median-iqr     | serum         | case-control | prospective                | 33,6 ± 4                   | 29,8 ± 3,8                      | 29,4 ± 19,1                      | 29 ± 19,5                             | N/A             | 39,7 ± 1,1                                | 38,8 ± 1,7                                     | 20%                     | 35,70%                       | 4100 ± 700                   | 3600 ± 600                        |
| Jahan et al.            | 2011 | India   | Asia          | 30                       | 40,2 ± 59,5              | 30                       | 21,6 ± 35,5                   | ELISA     | ng/ml                   | median-iqr     | serum         | case-control | prospective                | N/A                        | N/A                             | N/A                              | N/A                                   | Yes             | N/A                                       | N/A                                            | N/A                     | N/A                          | 3213,9 ± 1868,2              | 2842,6 ± 1401,2                   |
| Martino et al.          | 2016 | Spain   | Europe        | 17                       | 40,1 ± 26,8              | 67                       | 33,4 ± 40,4                   | ELISA     | mcg/L=ng/ml             | mean-sd        | plasma        | case-control | prospective                | 33,8 ± 4,2                 | 30,3 ± 5,4                      | 28,2 ± 7,5                       | 25,5 ± 4,8                            | No              | 39,1 ± 1,3                                | 39,3 ± 1,3                                     | 36%                     | 21%                          | 3392 ± 462,1                 | 3308,1 ± 492                      |
| Shang et al.            | 2018 | China   | Asia          | 105                      | 700000 ± 100000          | 103                      | 600000 ± 100000               | ELISA     | 1 mg/ml = 1000000 ng/ml | raw            | plasma        | case-control | prospective                | 29,8 ± 3                   | 29,9 ± 2,9                      | 27,8 ± 3,6                       | 27,7 ± 3,4                            | Yes (9,5% GDM)  | 39,3 ± 1,3                                | 39,2 ± 1                                       | 47,60%                  | 34%                          | 3561 ± 465                   | 3283 ± 419                        |
| Patro-Malysza et al.    | 2019 | Poland  | Europe        | 26                       | 14,9 ± 17,5              | 28                       | 8,9 ± 7,1                     | ELISA     | ng/ml                   | median-iqr     | serum         | case-control | prospective                | 35,9 ± 7,1                 | 30,4 ± 10,9                     | 27,3 ± 4,1                       | 21,5 ± 3,8                            | Yes (100% GDM)  | 38,8 ± 1,4                                | 39,7 ± 1,4                                     | N/A                     | N/A                          | 3248,2 ± 396,1               | 3471,4 ± 515,6                    |
| Manoharan et al.        | 2019 | India   | Asia          | 40                       | 88,7 ± 28,5              | 40                       | 54,7 ± 22,8                   | ELISA     | ng/ml                   | mean-sd        | plasma        | case-control | prospective                | 24,1 ± 2,5                 | 24,3 ± 2,2                      | 22,1 ± 2,6                       | 22,2 ± 1                              | Yes (100% GDM)  | 38,5 ± 1,1                                | 39,4 ± 1,1                                     | 32,50%                  | 27,50%                       | 3180 ± 460                   | 2870 ± 440                        |
| Benhalima et al.        | 2020 | Belgium | Europe        | 97                       | 12,1 ± 8,9               | 327                      | 11,1 ± 9,7                    | RIA       | mcg/L=ng/ml             | median-iqr     | *             | case-control | prospective                | 32,3 ± 4,8                 | 30,8 ± 3,9                      | N/A                              | N/A                                   | Yes (13,4% GDM) | 39,1 ± 1,2                                | 39,3 ± 1,3                                     | N/A                     | N/A                          | 3408,7 ± 424,7               | 3349,3 ± 411,5                    |
| De Luccia et al.        | 2021 | Brazil  | South America | 20                       | 174,6 ± 130,2            | 38                       | 63,5 ± 66,7                   | ELISA     | pg/ml= 0,001 ng/ml      | raw            | serum         | case-control | prospective                | 36,2 ± 4                   | 32,3 ± 6,2                      | 28,4 ± 5,1                       | 25,2 ± 5,1                            | N/A             | 38,6 ± 0,4                                | 39,3 ± 0,8                                     | 100% (elective)         | 100% (elective)              | 3370 ± 465,9                 | 3338 ± 315,7                      |
| Ortega-Senovilla et al. | 2022 | Germany | Europe        | 41                       | 17 ± 12,8                | 68                       | 11,6 ± 16,6                   | ELISA     | ng/ml                   | mean-SEM       | serum         | case-control | prospective                | 30,2 ± 5,1                 | 28,8 ± 5,8                      | 27 ± 5,8                         | 25,4 ± 5,8                            | No              | N/A                                       | N/A                                            | 0%                      | 0%                           | 3410 ± 512                   | 3500 ± 498                        |
| Anik et al.             | 2022 | Turkey  | Europe-Asia   | 30                       | 8,6 ± 5,9                | 54                       | 5,6 ± 5,4                     | ELISA     | pg/ml= 0,001 ng/ml      | median-iqr     | serum         | case-control | prospective                | 32,4 ± 4,1                 | 32,4 ± 4,9                      | N/A                              | N/A                                   | N/A             | 37,6 ± 0,8                                | 38 ± 1,5                                       | N/A                     | N/A                          | 3526,6 ± 501,2               | 3158,5 ± 621                      |

GDM, gestational diabetes mellitus; BMI, body mass index (kg/m2); N/A, not available; gestational age at delivery (weeks); Caesarean (%); newborn weight (grams).

## 4. Subgroup meta-analyses

### 4.1 Geographical area

**Figure S1.** Forest plot graphically representing the subgroup meta-analysis evaluating the changes in cord blood leptin levels between GDM patients and healthy control women, stratified by geographical area.

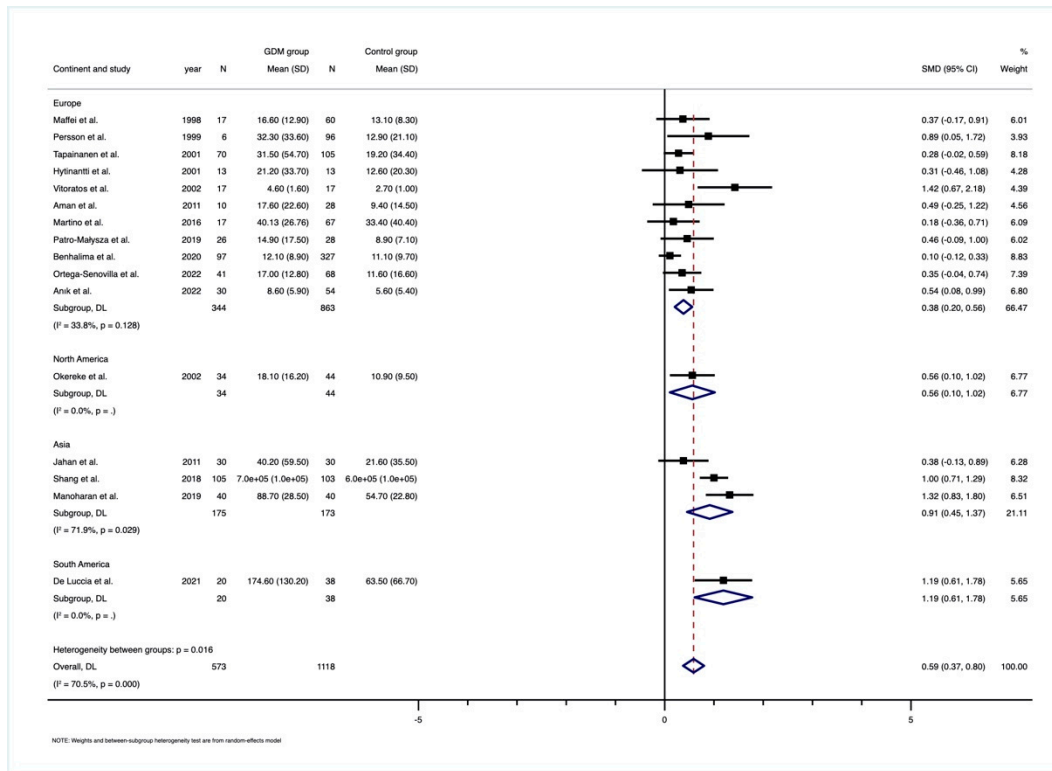

Random-effects model, inverse-variance weighting based on the DerSimonian and Laird method. Standardized mean difference (SMD) was chosen as effect size measure. A SMD>0 suggests that leptin levels are higher in GDM. Diamonds indicate the overall pooled SMDs with their corresponding 95% confidence intervals (CI).



## 4.2 Type of analysis technique

**Figure S2.** Forest plot graphically representing the subgroup meta-analysis evaluating the changes in cord blood leptin levels between GDM patients and healthy control women, stratified by type of analysis (ELISA vs RIA).

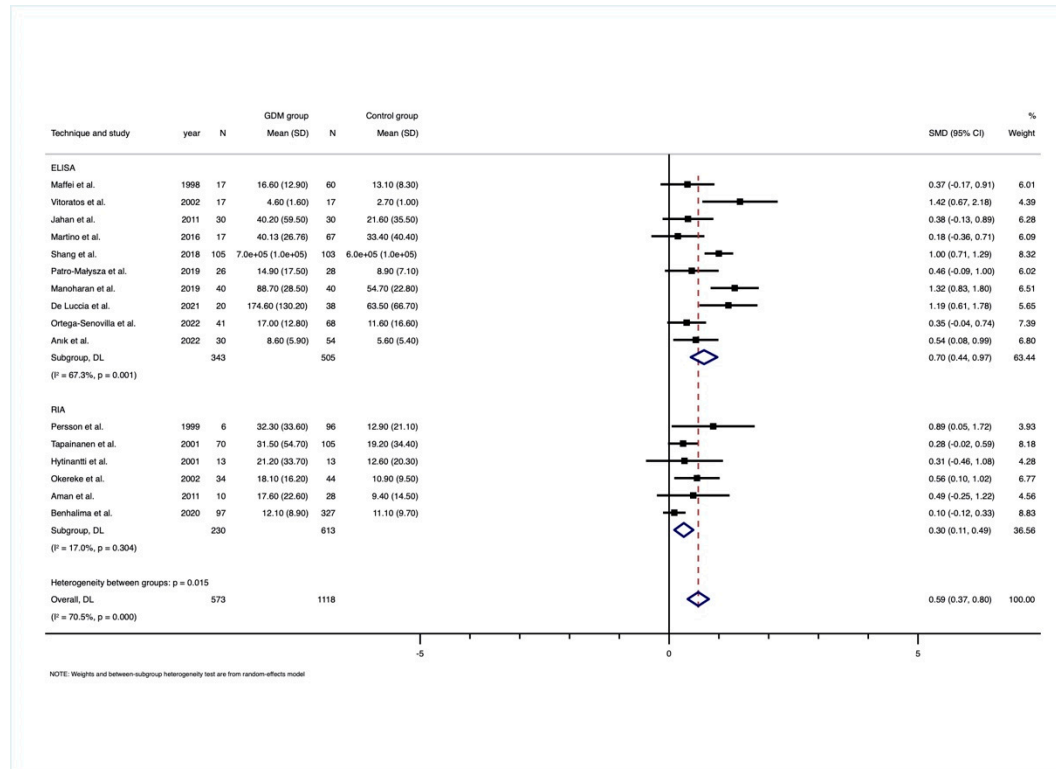

Random-effects model, inverse-variance weighting based on the DerSimonian and Laird method. Standardized mean difference (SMD) was chosen as effect size measure. A SMD>0 suggests that leptin levels are higher in GDM. Diamonds indicate the overall pooled SMDs with their corresponding 95% confidence intervals (CI).

### 4.3 Source of sample

**Figure S3.** Forest plot graphically representing the subgroup meta-analysis evaluating the changes in cord blood leptin levels between GDM patients and healthy control women, stratified by type of analysis (plasma vs serum).

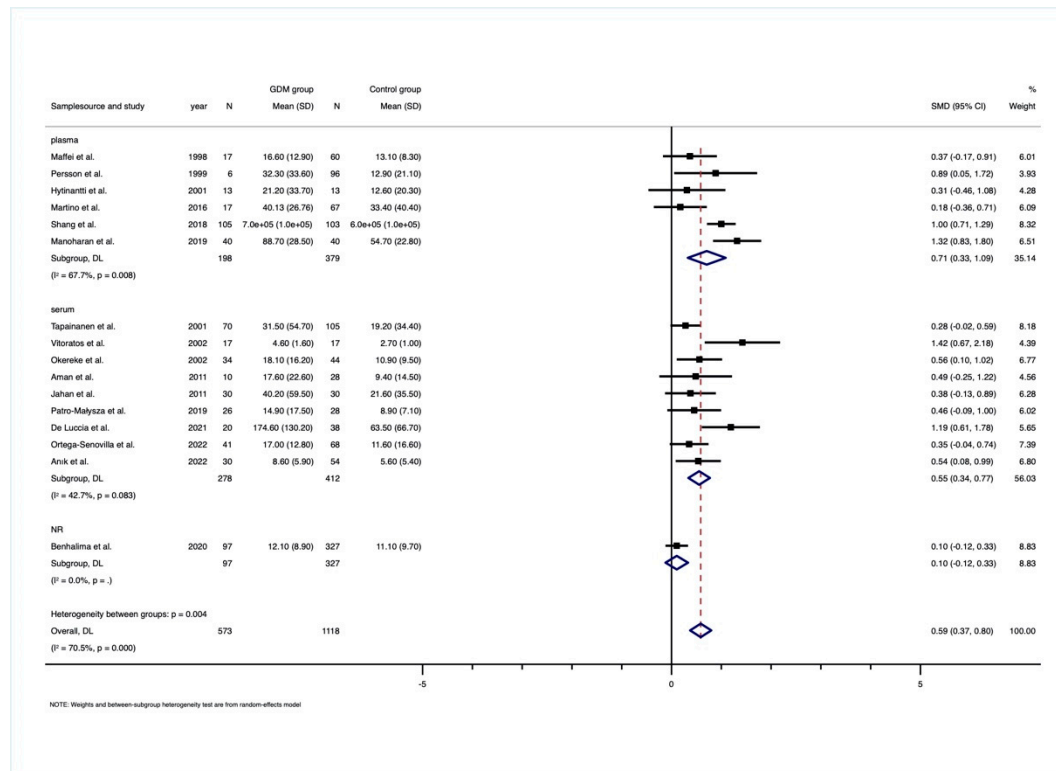

Random-effects model, inverse-variance weighting based on the DerSimonian and Laird method. Standardized mean difference (SMD) was chosen as effect size measure. A  $SMD > 0$  suggests that leptin levels are higher in GDM. Diamonds indicate the overall pooled SMDs with their corresponding 95% confidence intervals (CI).

## 4.4 Risk of bias

**Figure S4.** Forest plot graphically representing the subgroup meta-analysis evaluating the changes in cord blood leptin levels between GDM patients and healthy control women, stratified by risk of bias (low vs. moderate vs. high).

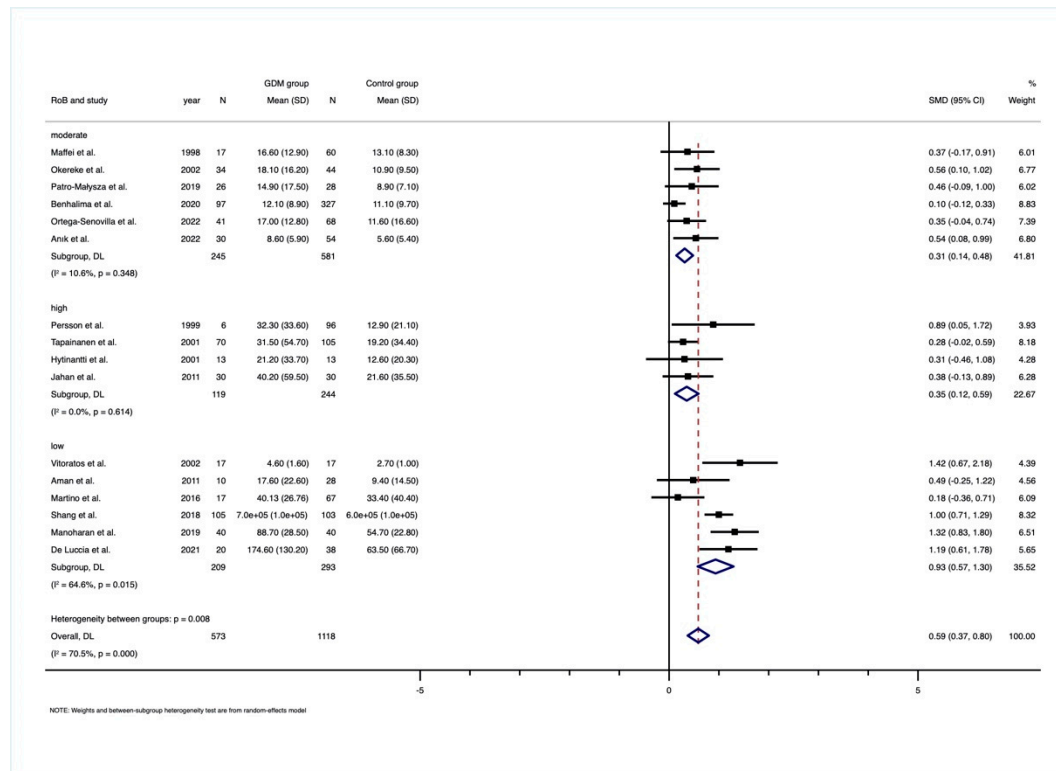

Random-effects model, inverse-variance weighting based on the DerSimonian and Laird method. Standardized mean difference (SMD) was chosen as effect size measure. A  $SMD > 0$  suggests that leptin levels are higher in GDM. Diamonds indicate the overall pooled SMDs with their corresponding 95% confidence intervals (CI).

## 5. Meta-regression analyses

### 5.1 Effect of the covariate age

**Figure S5.** Bubble plot graphically representing the univariable meta-regression analysis of the potential effect of age (years) on the cord blood leptin levels among patients with GDM compared with healthy control women.

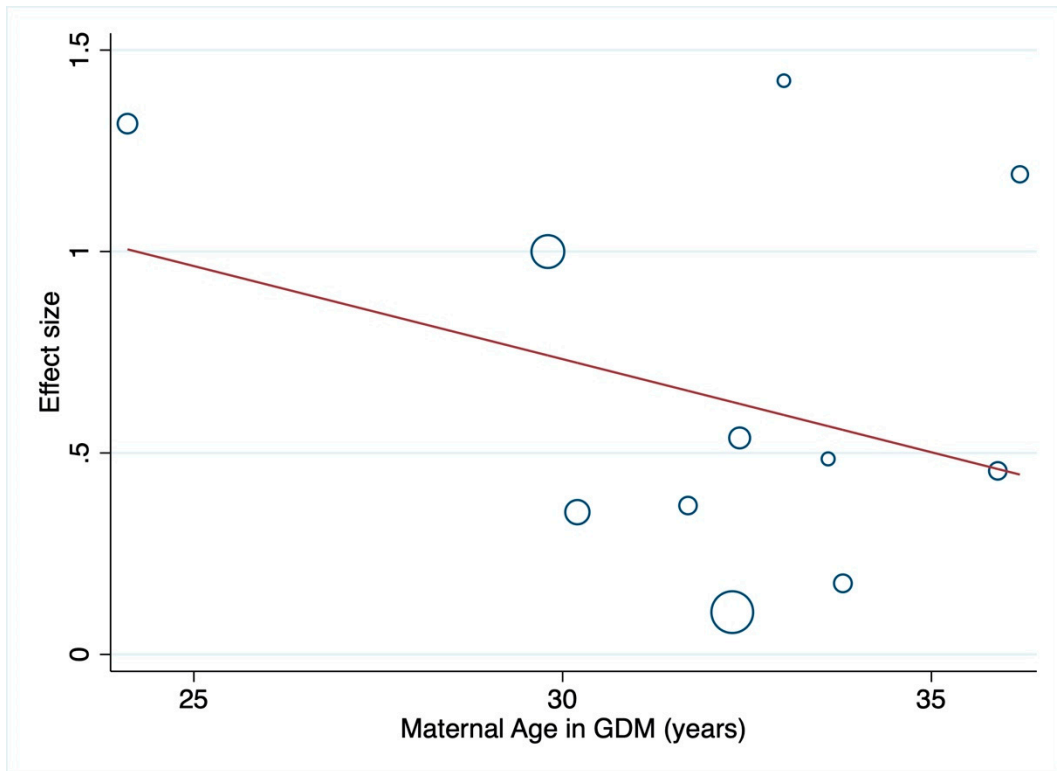

Random-effects univariable meta-regression. The red line exhibits the fitted regression line together with blue circles representing the estimates from each individual study, sized according to the precision of each estimate (the inverse of its within-study variance).

## 5.2 Effect of the covariate pregestational BMI

**Figure S6.** Bubble plot graphically representing the univariable meta-regression analysis of the potential effect of pregestational BMI (summary index score) on the cord blood leptin levels among patients with GDM compared with healthy control women.

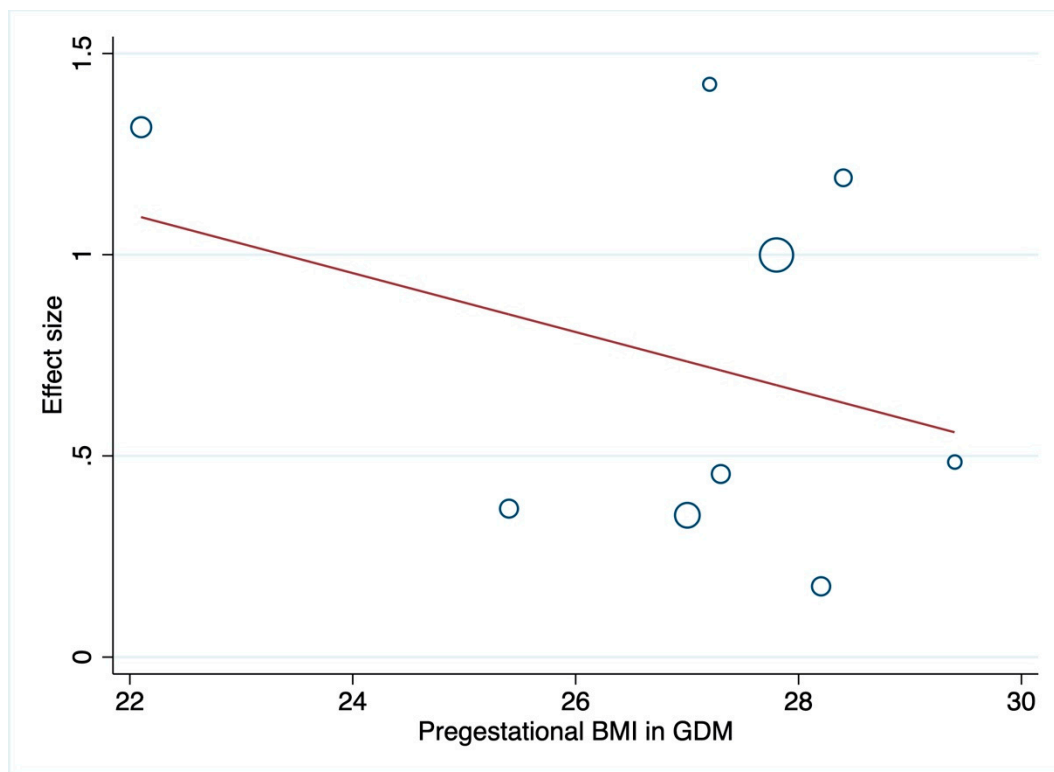

Random-effects univariable meta-regression. The red line exhibits the fitted regression line together with blue circles representing the estimates from each individual study, sized according to the precision of each estimate (the inverse of its within-study variance).

### 5.3 Effect of the covariate glycemia levels

**Figure S7.** Bubble plot graphically representing the univariable meta-regression analysis of the potential effect of glycemia levels (mmol/l) on the cord blood leptin levels among patients with GDM compared with healthy control women.

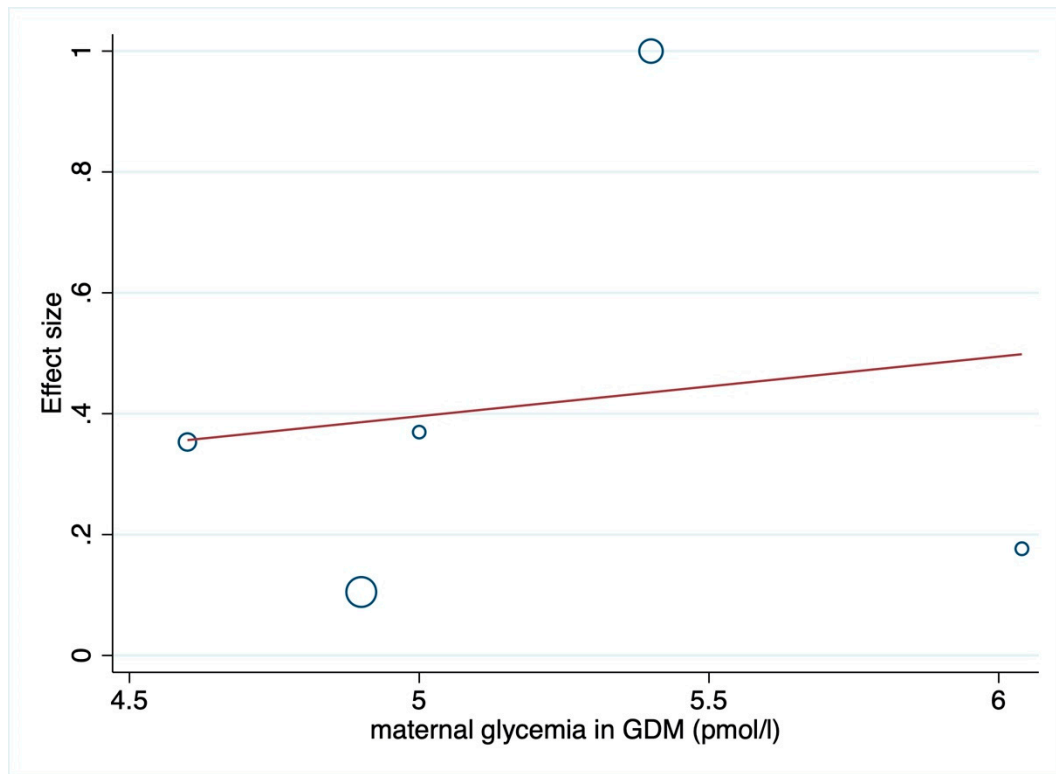

Random-effects univariable meta-regression. The red line exhibits the fitted regression line together with blue circles representing the estimates from each individual study, sized according to the precision of each estimate (the inverse of its within-study variance).

#### 5.4 Effect of the covariate insulin

**Figure S8.** Bubble plot graphically representing the univariable meta-regression analysis of the potential effect of insulin (pmol/l) on the cord blood leptin levels among patients with GDM compared with healthy control women.

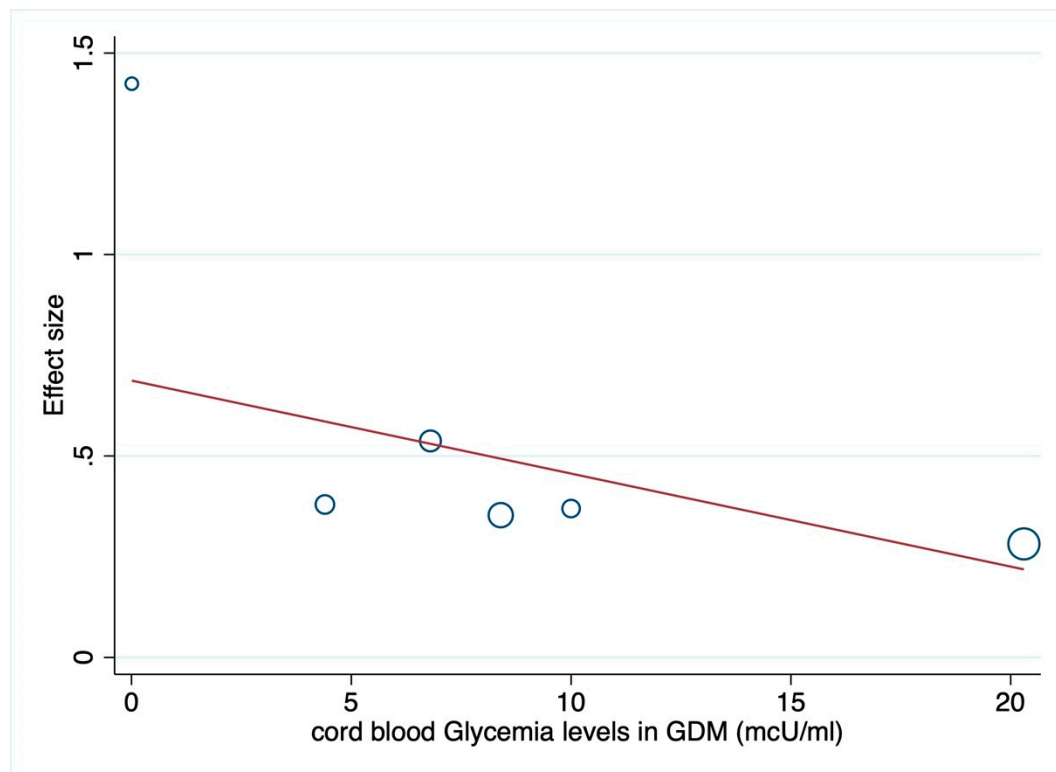

Random-effects univariable meta-regression. The red line exhibits the fitted regression line together with blue circles representing the estimates from each individual study, sized according to the precision of each estimate (the inverse of its within-study variance).

### 5.5 Effect of the covariate C peptide

**Figure S9.** Bubble plot graphically representing the univariable meta-regression analysis of the potential effect of C peptide (mmol/l) on the cord blood leptin levels among patients with GDM compared with healthy control women.

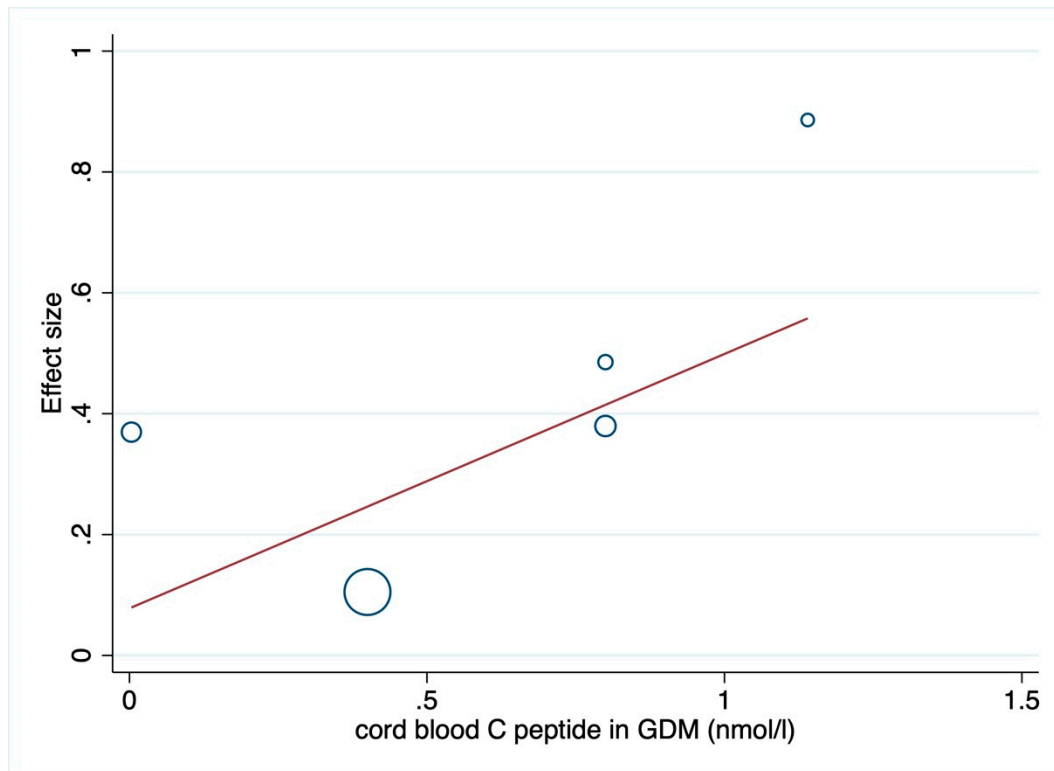

Random-effects univariable meta-regression. The red line exhibits the fitted regression line together with blue circles representing the estimates from each individual study, sized according to the precision of each estimate (the inverse of its within-study variance).



## 5.6 Effect of the covariate gestational age delivery

**Figure S10.** Bubble plot graphically representing the univariable meta-regression analysis of the potential effect of gestational age delivery (weeks) on the cord blood leptin levels among patients with GDM compared with healthy control women.

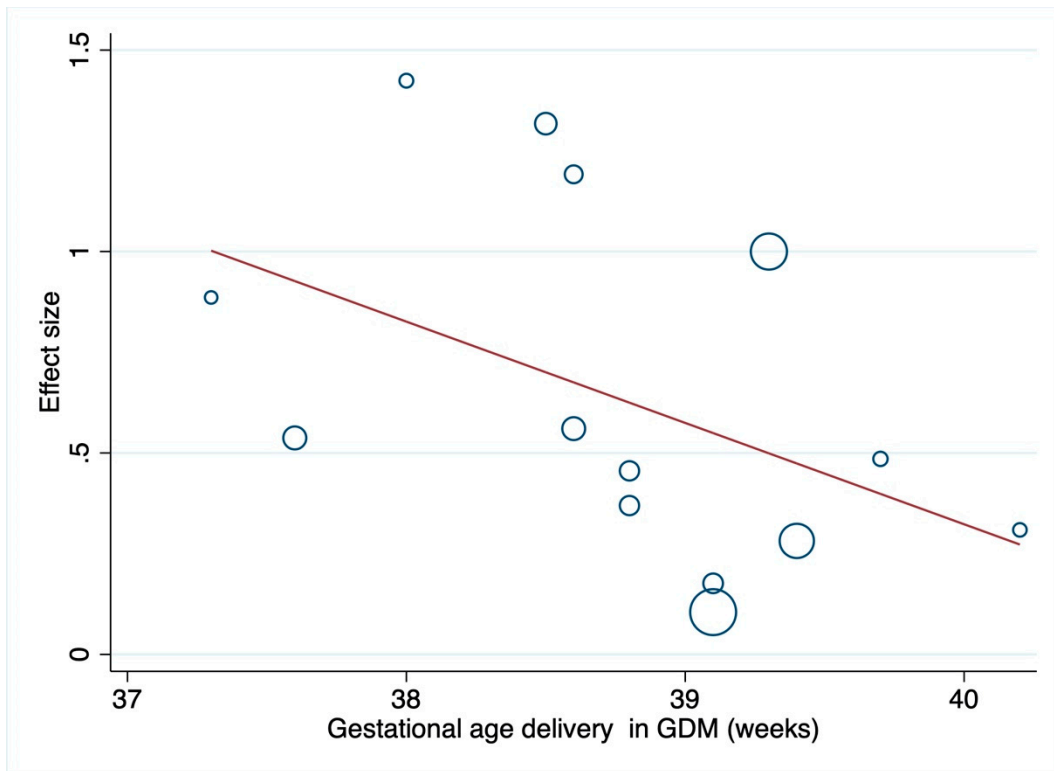

Random-effects univariable meta-regression. The red line exhibits the fitted regression line together with blue circles representing the estimates from each individual study, sized according to the precision of each estimate (the inverse of its within-study variance).

### 5.7 Effect of the covariate caesarian

**Figure S11.** Bubble plot graphically representing the univariable meta-regression analysis of the potential effect of caesarian (%) on the cord blood leptin levels among patients with GDM compared with healthy control women.

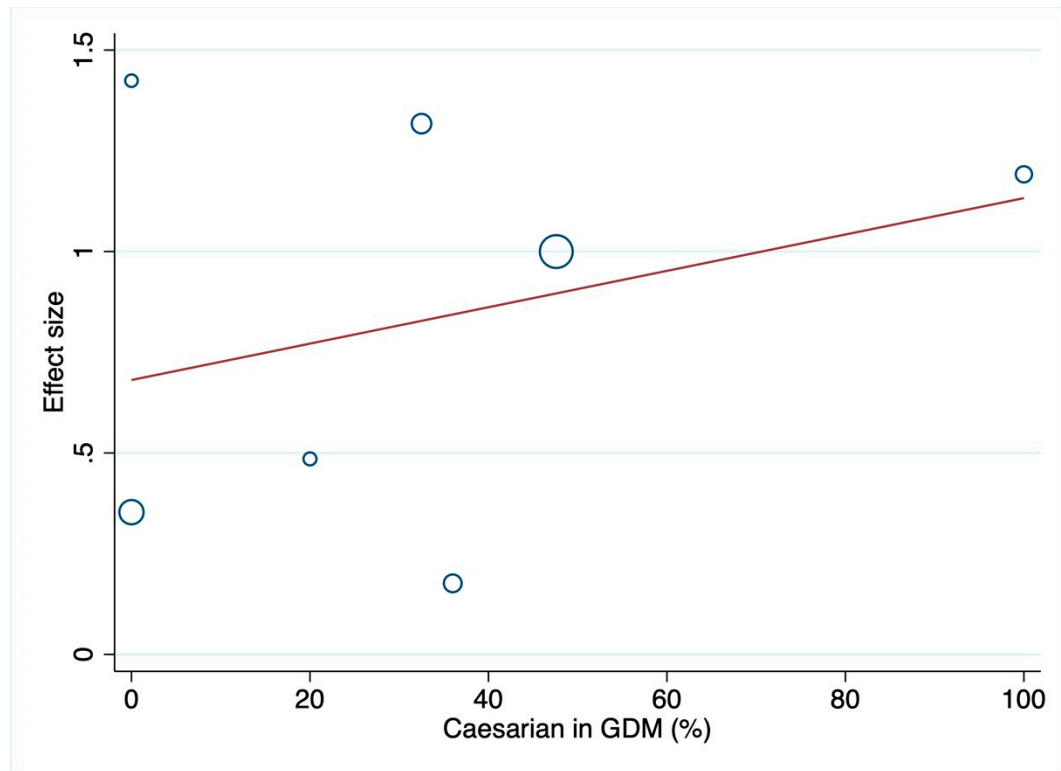

Random-effects univariable meta-regression. The red line exhibits the fitted regression line together with blue circles representing the estimates from each individual study, sized according to the precision of each estimate (the inverse of its within-study variance).

### 5.8 Effect of the covariate newborn weight

**Figure S12.** Bubble plot graphically representing the univariable meta-regression analysis of the potential effect of newborn weight (gr) on the cord blood leptin levels among patients with GDM compared with healthy control women.

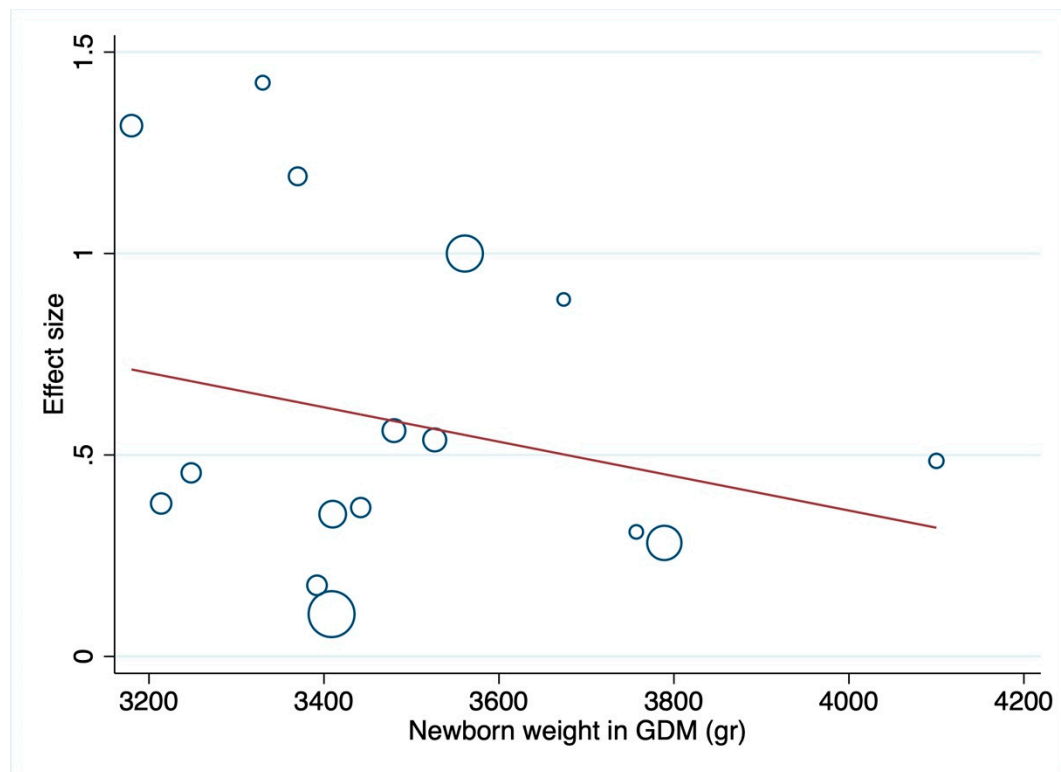

Random-effects univariable meta-regression. The red line exhibits the fitted regression line together with blue circles representing the estimates from each individual study, sized according to the precision of each estimate (the inverse of its within-study variance).

### 5.9 Effect of the covariate macrosomy

**Figure S13.** Bubble plot graphically representing the univariable meta-regression analysis of the potential effect of macrosomy (%) on the cord blood leptin levels among patients with GDM compared with healthy control women.

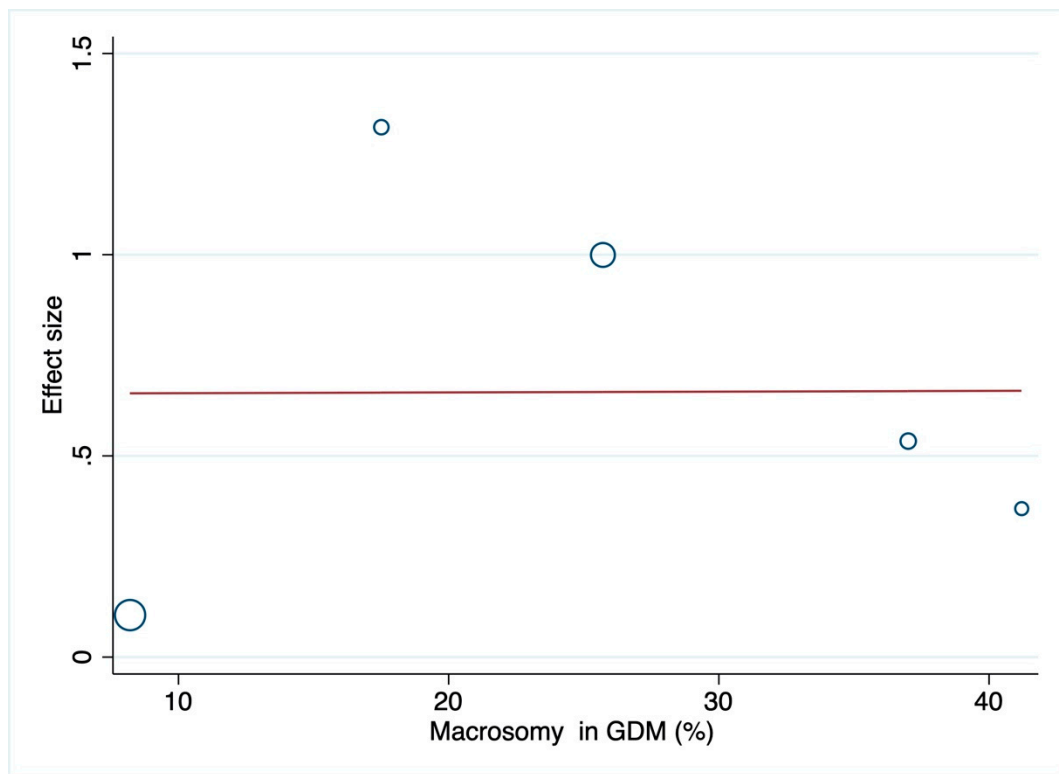

Random-effects univariable meta-regression. The red line exhibits the fitted regression line together with blue circles representing the estimates from each individual study, sized according to the precision of each estimate (the inverse of its within-study variance).

## 6. Sensitivity analysis.

**Figure S14.** Interval plot graphically representing the sensitivity analysis (“leave-one-out” method) of the studies pooled in the meta-analysis evaluating the changes in the cord blood leptin levels between GDM patients and healthy control women.

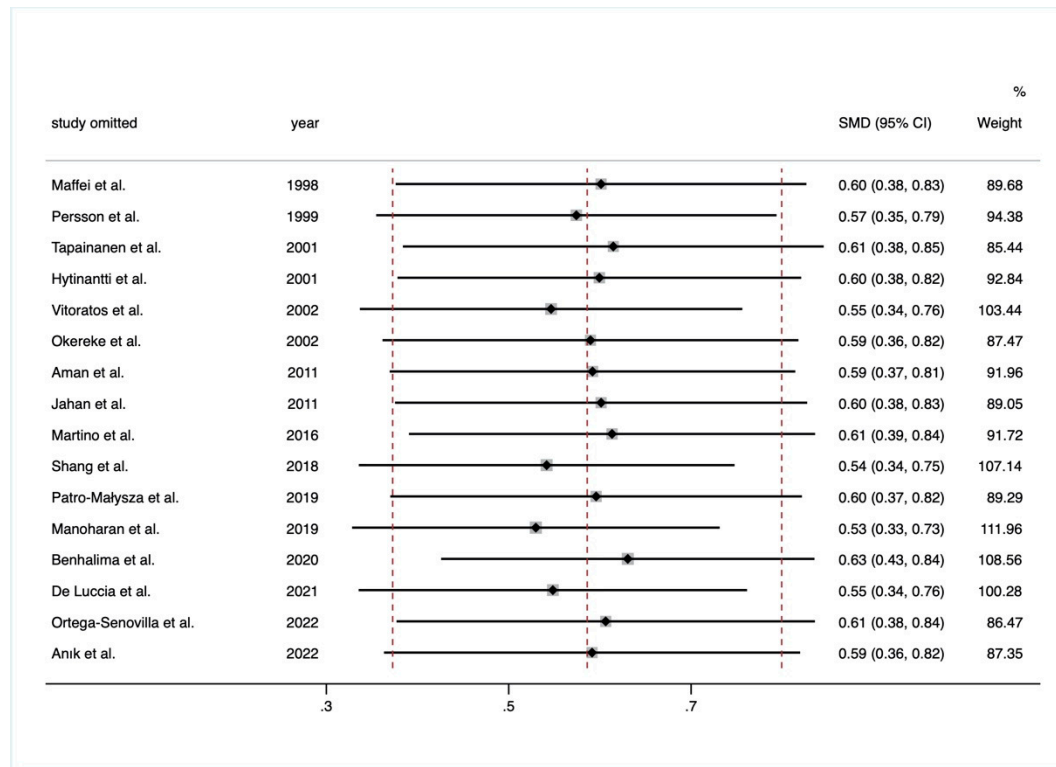

“Leave-one-out” method, sequentially omitting one study in the meta-analysis at a time, to investigate its influence on the overall result. In the interval plot, the usual diamond shape representing the pooled effect was replaced by vertical intermittent red lines, allowing a visual inspection analysis of influence.

## 7. Small-study effects analysis

**Figure S15. Funnel plot.** Funnel plots of the estimated cord blood leptin levels comparing GDM patients and healthy control women, expressed as standardized mean difference (SMD) against its standard error.

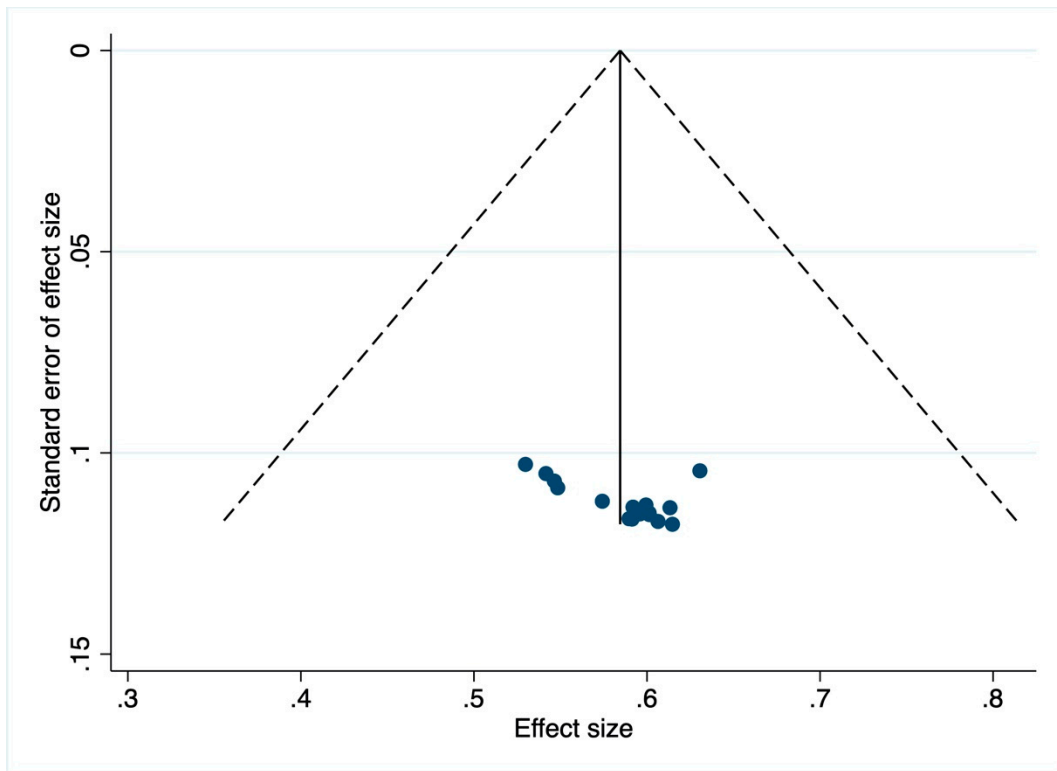

The black vertical line corresponds to the pooled SMD estimated in the meta-analysis. The two diagonal intermittent lines represent their pseudo-95%CI. The blue circles represent the estimates from primary-level studies.
